# Supplementary material for: High mucosal cytomegalovirus DNA helps predict adverse short-term outcome in acute severe ulcerative colitis
Source: PubMed Central journal article supplement — Intest Res. 2020 Nov 6;19(4):438–47. doi: 10.5217/ir.2020.00055 (PMC8566826; doi:10.5217/ir.2020.00055), 2020-11-06
Supplement: ir-2020-00055-suppl.pdf [file ir-2020-00055-suppl.pdf]

See “High mucosal cytomegalovirus DNA helps predict adverse short-term outcome in acute severe ulcerative colitis” on page 1-10.

**Supplementary Table 1.** Multivariable Analysis for Prediction of Colectomy during Index Admission in Acute Severe Ulcerative Colitis

| Variable                               | OR (95% CI)      | P-value |
|----------------------------------------|------------------|---------|
| Quantitative CMV DNA > 2,000 copies/mg | 17.2 (2.6–115.2) | < 0.01  |
| AIIMS index                            | 18.2 (2.9–114.4) | < 0.01  |

OR, odds ratio; CI, confidence interval; CMV, cytomegalovirus; AIIMS, All India Institute of Medical Sciences.
